# Supplementary material for: Controversies Surrounding Segments and Parasegments in Onychophora: Insights from the Expression Patterns of Four “Segment Polarity Genes” in the Peripatopsid Euperipatoides rowelli
Source: PubMed Central journal article supplement (PMC4255022; doi:10.1371/journal.pone.0114383), 2014-12-03
Supplement: pone.0114383.s001.pdf [file pone.0114383.s001.pdf]

cubitus interruptus

Sequence alignment for cubitus interruptus across species: Er\_ci, Ek\_ci, Tc\_ci, Al\_ci, Gm\_ci, Dm\_ci. Includes amino acid sequences and residue numbers (20, 40, 60, 80, 100, 120, 140, 160, 180, 200).

engrailed

Sequence alignment for engrailed across species: Er\_en, Ek\_en, Gm\_en, Af\_en, Tc\_en, Pd\_en, Al\_en. Includes amino acid sequences and residue numbers (20, 40, 60, 80, 100, 120, 140, 160, 180, 200, 220, 240, 260, 280, 300, 320, 340, 360, 380, 400, 420, 440).

hedgehog

Sequence alignment for hedgehog across species: Er\_hh, Ek\_hh, Gm\_hh, Af\_hh, Tc\_hh, Pd\_hh. Includes amino acid sequences and residue numbers (20, 40, 60, 80, 100, 120, 140, 160, 180, 200, 220, 240, 260, 280, 300, 320, 340, 360, 380, 400, 420, 440, 460, 480, 500, 520, 540).

wingless

Sequence alignment for wingless across species: Er\_wg, Ek\_wg, Ap\_wg, Dm\_wg, Dp\_Wnt1, Tc\_wg, Al\_wg, Is\_wg, Gm\_Wnt1, Ct\_Wnt1, Lg\_Wnt1, Pd\_Wnt1, Hs\_Wnt1, Hr\_Wnt1, Nv\_Wnt1, Dm\_Wnt6, Gm\_Wnt6, Tc\_Wnt6, Nv\_Wnt6. Includes amino acid sequences and residue numbers (20, 40, 60, 80, 100, 120, 140, 160, 180, 200, 220, 240, 260, 280, 300, 320, 340, 360, 380, 400, 420).
